# Supplementary material
Source: MDPI journal article supplement (https://www.mdpi.com/2504-446X/2/4/37)
Supplement: s1 [file s1]

library(ggmap)
library(smooth)
library(Mcomp)
library(zoo)
library(ggsn)
library(dplyr)
library(purrr)
library(magick)
library(gganimate)
library(directlabels)

Master_tracking_data$AvSpeed <- ave(Master_tracking_data$`CUSTOM.hSpeed [m/s]`, Master_tracking_data$SharkID, 
                                    FUN= function(x) rollmean(x, k=100, na.pad=T) )

Master_tracking_data$Lat <- ave(Master_tracking_data$OSD.latitude, Master_tracking_data$SharkID, 
                                FUN= function(x) rollmean(x, k=50, na.pad=T) )

Master_tracking_data$Long <- ave(Master_tracking_data$OSD.longitude, Master_tracking_data$SharkID, 
                                 FUN= function(x) rollmean(x, k=50, na.pad=T) )

#get Google API

key <- "YOUR API KEY HERE"
register_google(key = key)

#Do separately for each species (adjust map range)
#Blacktips


myloc <- c(151.913, -23.45, 151.924, -23.442)


heron <- get_map(location = myloc, source = "google", maptype = "satellite", crop = TRUE)

Blacktips <- ggmap(heron) + geom_path(aes(x=Long, y = Lat, group = SharkID, colour = AvSpeed), 
                          data = Master_tracking_data[which(Master_tracking_data$Species == "Blacktip"),],
                          size = 1.5, lineend = "round", na.rm = TRUE) + 
                          scale_colour_gradient(low = "black", high = "red") + 
                          xlab("Longitude") + ylab("Latitude") + labs(colour = "Smoothed speed (m/s)") + 
                          ylim(-23.449, -23.444) + xlim(151.914, 151.922) +
  scalebar(location = "bottomleft", y.min = -23.4485, y.max = -23.444, x.min = 151.915, x.max = 151.921, 
           dist = 0.1,  dd2km = TRUE, model = 'WGS84', st.dist = 0.02) +
  geom_dl(aes(x=Long, y = Lat, label = SharkID),  
          data = Master_tracking_data[which(Master_tracking_data$Species == "Blacktip"),], method = "first.points")

Blacktips

#Epaulettes

myloc <- c(151.9135, -23.4465, 151.917, -23.444)


heron <- get_map(location = myloc, source = "google", maptype = "satellite", crop = TRUE)

Epaulettes <- ggmap(heron) + geom_path(aes(x=Long, y = Lat, group = SharkID, colour = AvSpeed), 
                          data = Master_tracking_data[which(Master_tracking_data$Species == "Epaulette"),], 
                          size = 1.5, lineend = "round", na.rm  = TRUE) + ylim(-23.446, -23.4445) +
                          scale_colour_gradient(low = "black", high = "red") + 
                          xlab("Longitude") + ylab("Latitude") + labs(colour = "Smoothed speed (m/s)") +
  scalebar(location = "bottomleft", y.min = -23.4459, y.max = -23.4445, x.min = 151.9138, x.max = 151.917, 
           dist = 0.1,  dd2km = TRUE, model = 'WGS84', st.dist = 0.02) +
  geom_dl(aes(x=Long, y = Lat, label = SharkID),  
          data = Master_tracking_data[which(Master_tracking_data$Species == "Epaulette"),], method = "last.points")


Epaulettes


#time series

Black <- ggplot(data = Master_tracking_data[which(Master_tracking_data$Species == "Blacktip"),],
                aes(x = Time, y = AvSpeed)) + geom_line() + theme_classic() + 
  ylab("Smoothed speed (m/s)") + xlab("Tracking time (s)") + facet_wrap(~SharkID)

Black

Epau <- ggplot(data = Master_tracking_data[which(Master_tracking_data$Species == "Epaulette"),],
                aes(x = Time, y = AvSpeed)) + geom_line() + theme_classic() + 
  ylab("Smoothed speed (m/s)") + xlab("Tracking time (s)")  + facet_wrap(~SharkID)

Epau

#linear models

fitblack <- lm(AvSpeed ~ Time * SharkID, data = Master_tracking_data[which(Master_tracking_data$Species == "Blacktip"),])

summary(fitblack)

anova(fitblack)

fitep <- lm(AvSpeed ~ Time * SharkID, data = Master_tracking_data[which(Master_tracking_data$Species == "Epaulette"),])

summary(fitep)

anova(fitep)


#trajectory analysis

library(trajr)
library(rgdal)

#first transform GPS coordinates into UTM

dat <- Master_tracking_data
coordinates(dat) <- ~OSD.longitude+OSD.latitude
proj4string(dat) <- CRS("+proj=longlat +datum=WGS84")
dat_transformed <- spTransform(dat, CRS("+proj=utm +zone=56 +south +datum=WGS84"))

coords <- data.frame(x = dat_transformed@coords[,1], y = dat_transformed@coords[,2], 
                     time = dat_transformed$Time, Shark = dat_transformed$SharkID, 
                     Species = dat_transformed$Species)

#create individual csvs for each track

dflist <- split(coords, f = coords$Shark)

sapply(names(dflist), 
       function (x) write.csv(dflist[[x]], file=paste(x, "csv", sep=".") )   )

#import CSV and remove number column REMEMBER TO REMOVE NUMBER COLUMN!!!!

test <- read.csv("EP1.csv")
test$X <- NULL

#build trajectories for individual tracks and combine for Epaulettes

par(mfrow = c(5, 2))

trj <- TrajFromCoords(test, fps = 10)

smoothed <- TrajSmoothSG(trj, p = 3, n = 51)

intervals <- TrajSpeedIntervals(smoothed, slowerThan = 0.2)
trjep1 <- plot(intervals[which(intervals$duration > 5),])


test <- read.csv("EP2.csv")
test$X <- NULL

trj <- TrajFromCoords(test, fps = 10)

smoothed <- TrajSmoothSG(trj, p = 3, n = 51)

intervals <- TrajSpeedIntervals(smoothed, slowerThan = 0.2)
trjep2 <- plot(intervals[which(intervals$duration > 5),])

test <- read.csv("EP3.csv")
test$X <- NULL

trj <- TrajFromCoords(test, fps = 10)

smoothed <- TrajSmoothSG(trj, p = 3, n = 51)

intervals <- TrajSpeedIntervals(smoothed, slowerThan = 0.2)
trjep3 <- plot(intervals[which(intervals$duration > 5),])

test <- read.csv("EP4.csv")
test$X <- NULL

trj <- TrajFromCoords(test, fps = 10)

smoothed <- TrajSmoothSG(trj, p = 3, n = 51)

intervals <- TrajSpeedIntervals(smoothed, slowerThan = 0.2)
trjep4 <- plot(intervals[which(intervals$duration > 5),])

test <- read.csv("EP5.csv")
test$X <- NULL

trj <- TrajFromCoords(test, fps = 10)

smoothed <- TrajSmoothSG(trj, p = 3, n = 51)

intervals <- TrajSpeedIntervals(smoothed, slowerThan = 0.2)
trjep5 <- plot(intervals[which(intervals$duration > 5),])

test <- read.csv("EP6.csv")
test$X <- NULL

trj <- TrajFromCoords(test, fps = 10)

smoothed <- TrajSmoothSG(trj, p = 3, n = 51)

intervals <- TrajSpeedIntervals(smoothed, slowerThan = 0.2)
trjep6 <- plot(intervals[which(intervals$duration > 5),])

test <- read.csv("EP7.csv")
test$X <- NULL

trj <- TrajFromCoords(test, fps = 10)

smoothed <- TrajSmoothSG(trj, p = 3, n = 51)

intervals <- TrajSpeedIntervals(smoothed, slowerThan = 0.2)
trjep7 <- plot(intervals[which(intervals$duration > 5),])

test <- read.csv("EP8.csv")
test$X <- NULL

trj <- TrajFromCoords(test, fps = 10)

smoothed <- TrajSmoothSG(trj, p = 3, n = 51)

intervals <- TrajSpeedIntervals(smoothed, slowerThan = 0.2)
trjep8 <- plot(intervals[which(intervals$duration > 5),])

test <- read.csv("EP9.csv")
test$X <- NULL

trj <- TrajFromCoords(test, fps = 10)

smoothed <- TrajSmoothSG(trj, p = 3, n = 51)

intervals <- TrajSpeedIntervals(smoothed, slowerThan = 0.2)
trjep9 <- plot(intervals[which(intervals$duration > 5),])

#two tracks with most intervals and least intervals

par(mfrow = c(2, 1))

test <- read.csv("EP4.csv")
test$X <- NULL

trj <- TrajFromCoords(test, fps = 10)

smoothed <- TrajSmoothSG(trj, p = 3, n = 51)

intervals <- TrajSpeedIntervals(smoothed, slowerThan = 0.2)
trjep4 <- plot(intervals[which(intervals$duration > 5),])

test <- read.csv("EP7.csv")
test$X <- NULL

trj <- TrajFromCoords(test, fps = 10)

smoothed <- TrajSmoothSG(trj, p = 3, n = 51)

intervals <- TrajSpeedIntervals(smoothed, slowerThan = 0.2)
trjep7 <- plot(intervals[which(intervals$duration > 5),])


#same for blacktips

par(mfrow = c(3, 2))

test <- read.csv("BLK1.csv")
test$X <- NULL

trj <- TrajFromCoords(test, fps = 10)

smoothed <- TrajSmoothSG(trj, p = 3, n = 51)

intervals <- TrajSpeedIntervals(smoothed, slowerThan = 0.2)
trjblk1 <- plot(intervals[which(intervals$duration > 5),])

test <- read.csv("BLK2.csv")
test$X <- NULL

trj <- TrajFromCoords(test, fps = 10)

smoothed <- TrajSmoothSG(trj, p = 3, n = 51)

intervals <- TrajSpeedIntervals(smoothed, slowerThan = 0.2)
trjblk2 <- plot(intervals[which(intervals$duration > 5),])

test <- read.csv("BLK3.csv")
test$X <- NULL

trj <- TrajFromCoords(test, fps = 10)

smoothed <- TrajSmoothSG(trj, p = 3, n = 51)

intervals <- TrajSpeedIntervals(smoothed, slowerThan = 0.2)
trjblk13 <- plot(intervals[which(intervals$duration > 5),])

test <- read.csv("BLK4.csv")
test$X <- NULL

trj <- TrajFromCoords(test, fps = 10)

smoothed <- TrajSmoothSG(trj, p = 3, n = 51)

intervals <- TrajSpeedIntervals(smoothed, slowerThan = 0.2)
trjblk4 <- plot(intervals[which(intervals$duration > 5),])

test <- read.csv("LEM1.csv")
test$X <- NULL

trj <- TrajFromCoords(test, fps = 10)

smoothed <- TrajSmoothSG(trj, p = 3, n = 51)

intervals <- TrajSpeedIntervals(smoothed, slowerThan = 0.2)
trjlem1 <- plot(intervals[which(intervals$duration > 5),])


#analyse multiple trajectories
#start by creating data frame for csvs

setwd("D:/Dropbox/Dropbox/Papers/Shark tracking drones/Individual tracks")

tracks <- as.data.frame(rbind(
  c("EP1.csv", "Epaulette", "red"),
  c("EP2.csv", "Epaulette", "red"),
  c("EP3.csv", "Epaulette", "red"),
  c("EP4.csv", "Epaulette", "red"),
  c("EP5.csv", "Epaulette", "red"),
  c("EP6.csv", "Epaulette", "red"),
  c("EP7.csv", "Epaulette", "red"),
  c("EP8.csv", "Epaulette", "red"),
  c("EP9.csv", "Epaulette", "red"),
  c("BLK1.csv", "Blacktip", "black"),
  c("BLK2.csv", "Blacktip", "black"),
  c("BLK3.csv", "Blacktip", "black"),
  c("BLK4.csv", "Blacktip", "black"),
  c("LEM1.csv", "Lemon", "grey")), stringsAsFactors = FALSE)

colnames(tracks) <- c("filename", "species", "col")
  
tracks <- na.omit(tracks)
  
csvStruct <- list(x = "x", y = "y", time = "time")
  
trjs <- TrajsBuild(tracks$filename,  
                     spatialUnits = "m", timeUnits = "s", 
                     csvStruct = csvStruct, rootDir = "..")

# of interest for a single trajectory
characteriseTrajectory <- function(trj) {
  # Measures of speed
  smoothed <- TrajSmoothSG(trj, p = 3, n = 51)
  derivs <- TrajDerivatives(smoothed)
  mean_speed <- mean(derivs$speed)
  sd_speed <- sd(derivs$speed)
  interv <- TrajSpeedIntervals(smoothed, slowerThan = 0.2)
  intervals <- nrow(interv[interv$duration > 5,])
  distance <- sum(derivs$speed)*0.1
  duration <- distance/mean_speed

  # Measures of straightness
  sinuosity <- TrajSinuosity(smoothed)
  resampled <- TrajRediscretize(smoothed, .001)
  Emax <- TrajEmax(resampled)
  

  # Return a list with all of the statistics for this trajectory
  list(duration = duration,
       distance = distance,
       mean_speed = mean_speed,
       sd_speed = sd_speed,
       sinuosity = sinuosity,
       Emax = Emax,
       intervals = intervals/(duration/60))
}

# Calculate all stats for trajectories in the list
# which was built in the previous example
stats <- TrajsMergeStats(trjs, characteriseTrajectory)
print(stats)

#plot PCA

#create function (adjust xlim and ylim as needed)
customPcaPlot <- function(x, xlabs, xcols, choices = 1L:2L, ycol = "#ff2222aa", ...) {
  # Draw points
  pts <- t(t(x$x[, choices]))
  plot(pts, type = "p", 
       xlim = extendrange(pts[, 1L]), ylim = c(-4, 2), 
       asp = 1,
       xlab = "PC1", ylab = "PC2", pch = 16, col = xcols, ...)
  text(pts, labels = xlabs, pos = 1, ...)
  
  # Draw arrows
  axs <- t(t(x$rotation[, choices])) * 3.5
  text(axs, labels = dimnames(axs)[[1L]], col = ycol, ...)
  arrows(0, 0, axs[, 1L] * .8, axs[, 2L] * .8, length = .1, col = ycol)
}


PCA <- prcomp(stats, scale. = TRUE)

#plot
customPcaPlot(PCA, tracks$category, tracks$col, cex = .8)
legend("bottomright", c("Epaulette", "Lemon", "Blacktip"), pch = 16, 
       col = c('red', 'grey', 'black'), inset = c(0.25, 0.05), cex = 0.8, bty = "n")


#animation graphics
#Blacktips

Master_tracking_data$CUSTOM.updateTime <- as.POSIXct(strptime(Master_tracking_data$CUSTOM.updateTime,
                                                              "%Y-%m-%d %H:%M:%S", tz = "UTC"))


#prepare data
BlackCleaned <- Master_tracking_data[which((Master_tracking_data$Species == "Blacktip")),]


BlackCleaned[,c(6:250)] <- NULL
BlackCleaned[,6] <- NULL
BlackCleaned <- na.omit(BlackCleaned)
BlackCleaned2 = BlackCleaned[seq(1, nrow(BlackCleaned), 10), ]
BlackCleaned$SharkID <- as.factor(BlackCleaned$SharkID)
BlackCleaned$Time <- round(BlackCleaned$Time)

#basemap
myloc <- c(151.913, -23.45, 151.924, -23.442)


heron <- get_map(location = myloc, source = "google", maptype = "satellite", crop = TRUE)


Blackmap <- ggmap(heron) + 
  xlab("Longitude") + ylab("Latitude") + ylim(-23.449, -23.444) + xlim(151.914, 151.922) +
  scalebar(location = "bottomleft", y.min = -23.4485, y.max = -23.444, x.min = 151.915, x.max = 151.921, 
           dist = 0.1,  dd2km = TRUE, model = 'WGS84', st.dist = 0.03)

#gganimate approach 
Blackmap + geom_point(data=BlackCleaned, aes(x=Long, y=Lat, group = SharkID), size = 2, 
                      show.legend=F, na.rm = TRUE) +
  transition_time(BlackCleaned$Time) + ease_aes("linear") + labs(title = "Track time (seconds): {round(frame_time)}") +
  shadow_wake(wake_length =1, wrap = FALSE, alpha = FALSE, size = TRUE)


#manual approach
ndwi_map <- function(Second){
  
  Blackmap + geom_point(data=BlackCleaned[BlackCleaned$Time == Second,], 
                  aes(x=Long, y=Lat),  colour = "red", size = 3, show.legend=F)  + 
             geom_path(data = BlackCleaned[BlackCleaned$Time == c(1:Second),], 
                       aes(cumulative = TRUE, x = Long, y = Lat, group = SharkID), size = 1.5, na.rm = TRUE)
  print(paste0("saving plot ", Second))
  ggsave(filename = paste0("C:/GIF/hgm_ndwi_",Second,".png"),
         width = 8,height=7,dpi = 150)
}

seq(from = 5, to = 677, by  = 10) %>%
  map_df(ndwi_map)

#animation graphics
#Epaulettes


myloc <- c(151.9135, -23.4465, 151.917, -23.444)


heron <- get_map(location = myloc, source = "google", maptype = "satellite", crop = TRUE)

Epaulettemap <- ggmap(heron) + ylim(-23.446, -23.4445) +
  xlab("Longitude") + ylab("Latitude") + labs(colour = "Smoothed speed (m/s)") + 
  scalebar(location = "bottomleft", y.min = -23.4459, y.max = -23.4445, x.min = 151.9138, x.max = 151.917, 
           dist = 0.1,  dd2km = TRUE, model = 'WGS84', st.dist = 0.04)

EpaulCleaned <- Master_tracking_data[which((Master_tracking_data$Species == "Epaulette")),]


EpaulCleaned[,c(6:250)] <- NULL
EpaulCleaned <- na.omit(EpaulCleaned)
EpaulCleaned$SharkID <- as.factor(EpaulCleaned$SharkID)
EpaulCleaned$Time <- round(EpaulCleaned$Time)


Epaulettemap + geom_point(data=EpaulCleaned, aes(x=Long, y=Lat, group = SharkID), size = 2, 
                      show.legend=F, na.rm = TRUE) +
  transition_time(EpaulCleaned$Time) + ease_aes("linear") + labs(title = "Track time (seconds): {round(frame_time)}") +
  shadow_wake(wake_length =1, wrap = FALSE, alpha = FALSE, size = TRUE)


ndwi_map <- function(Second){
  
  Epaulettemap + geom_point(data=EpaulCleaned[EpaulCleaned$Time == Second,], 
                        aes(x=Long, y=Lat),  colour = "red", size = 3, show.legend=F) 
  print(paste0("saving plot ", Second))
  ggsave(filename = paste0("C:/GIF/hgm_ndwi_",Second,".png"),
         width = 8,height=5,dpi = 150)
}

seq(from = 5, to = 597, by  = 10) %>%
  map_df(ndwi_map)
